# Supplementary material for: uPA‐PAI‐1 heteromerization promotes breast cancer progression by attracting tumorigenic neutrophils
Source: PubMed Central journal article supplement (PMC8185543; doi:10.15252/emmm.202013110), 2021-05-16
Supplement: EMMM-13-e13110-s003.pdf [file EMMM-13-e13110-s003.pdf]

## **APPENDIX**

Appendix tables S1, S2, and S3

Appendix figures S1, S2, S3, and S4

## Appendix tables

| specimen number | histology                               | grade | PAI-1 protein [ng/ml] | uPA protein [ng/ml] | extravascular neutrophils [n / mm <sup>2</sup> ] | intravascular neutrophils [n / mm <sup>2</sup> ] |
|-----------------|-----------------------------------------|-------|-----------------------|---------------------|--------------------------------------------------|--------------------------------------------------|
| 1               | mixed invasive lobular/ductal carcinoma | G1    | 10.83                 | 6.64                | 782.68                                           | 545.50                                           |
| 2               | invasive ductal carcinoma               | G1    | 14.49                 | 5.67                | 1,423.29                                         | 1,501.63                                         |
| 3               | invasive ductal carcinoma               | G1    | 28.43                 | 6.66                | 1,657.56                                         | 4,490.48                                         |
| 4               | mixed invasive lobular/ductal carcinoma | G1    | 12.23                 | 1.76                | 1,164.05                                         | 2,993.28                                         |
| 5               | mixed invasive lobular/ductal carcinoma | G1    | 46.55                 | 7.97                | 3,450.43                                         | 4,540.04                                         |
| 6               | mixed invasive lobular/ductal carcinoma | G2    | 9.40                  | 0.92                | 2,875.82                                         | 3,229.48                                         |
| 7               | invasive ductal carcinoma               | G2    | 15.64                 | 3.32                | 1,028.08                                         | 639.07                                           |
| 8               | invasive ductal carcinoma               | G2    | 9.40                  | 1.48                | 2,684.73                                         | 1,534.13                                         |
| 9               | invasive lobular carcinoma              | G2    | 27.75                 | 3.68                | 625.64                                           | 2,027.54                                         |
| 10              | invasive lobular carcinoma              | G2    | 6,13                  | 0,54                | 2,174.57                                         | 1,199.76                                         |
| 11              | invasive lobular carcinoma              | G2    | 16.98                 | 1.73                | 4,114.31                                         | 16,228.70                                        |
| 12              | invasive ductal carcinoma               | G2    | 37.61                 | 2.89                | 3,440.92                                         | 4,697.66                                         |
| 13              | invasive ductal carcinoma               | G2    | 25.68                 | 1.55                | 274.74                                           | 595.28                                           |
| 14              | invasive lobular carcinoma              | G2    | 32.17                 | 5.63                | 1,723.48                                         | 3,770.12                                         |
| 15              | invasive ductal carcinoma               | G2    | 35.01                 | 5.36                | 3,133.51                                         | 3,240.09                                         |
| 16              | invasive ductal carcinoma               | G2    | 16.05                 | 1.65                | 708.60                                           | 2,000.75                                         |
| 17              | invasive ductal carcinoma               | G2    | 12.00                 | 2.68                | 4,279.50                                         | 4,054.26                                         |
| 18              | mixed invasive lobular/ductal carcinoma | G2    | 20.54                 | 1.86                | 1,094.44                                         | 2,736.09                                         |
| 19              | invasive lobular carcinoma              | G2    | 14.22                 | 1.78                | 1,528.97                                         | 1,868.74                                         |
| 20              | invasive micropapillary carcinoma       | G2    | 10.81                 | 3.32                | 989.33                                           | 2,398.78                                         |
| 21              | mixed invasive lobular/ductal carcinoma | G2    | 23.68                 | 3.76                | 412.04                                           | 1,381.53                                         |
| 22              | invasive ductal carcinoma               | G2    | 29.91                 | 4.57                | 1,689.91                                         | 3,869.00                                         |
| 23              | invasive lobular carcinoma              | G2    | 20.35                 | 2.30                | 355.83                                           | 1,392.37                                         |
| 24              | invasive lobular carcinoma              | G2    | 40.55                 | 0.52                | 6,283.55                                         | 11,753.17                                        |
| 25              | invasive ductal carcinoma               | G2    | 18.52                 | 2.99                | 978.07                                           | 2,941.62                                         |
| 26              | invasive ductal carcinoma               | G2    | 10.11                 | 1.62                | 2,366.36                                         | 5,733.88                                         |
| 27              | invasive ductal carcinoma               | G2    | 13.95                 | 6.85                | 668.17                                           | 2,111.41                                         |
| 28              | invasive ductal carcinoma               | G2    | 20.77                 | 5.23                | 1,038.76                                         | 2,095.13                                         |
| 29              | invasive lobular carcinoma              | G2    | 29.59                 | 2.92                | 2,400.83                                         | 3,906.34                                         |
| 30              | invasive ductal carcinoma               | G2    | 21.42                 | 6.68                | 2,548.16                                         | 3,136.71                                         |
| 31              | invasive ductal carcinoma               | G2    | 21.03                 | 5.28                | 1,165.98                                         | 4,387.78                                         |
| 32              | invasive ductal carcinoma               | G2    | 23.92                 | 7.24                | 2,695.33                                         | 5,003.99                                         |
| 33              | invasive ductal carcinoma               | G2    | 48.69                 | 7.56                | 583.23                                           | 1,621.37                                         |

|    |                            |    |        |      |           |           |
|----|----------------------------|----|--------|------|-----------|-----------|
| 34 | invasive lobular carcinoma | G2 | 13.44  | 2.82 | 3,428.36  | 3,795.68  |
| 35 | invasive ductal carcinoma  | G3 | 16.76  | 9.91 | 890.42    | 1,307.80  |
| 36 | invasive lobular carcinoma | G3 | 23.88  | 6.03 | 92.15     | 506.81    |
| 37 | invasive ductal carcinoma  | G3 | 15.01  | 6.17 | 7,298.70  | 15,977.51 |
| 38 | invasive ductal carcinoma  | G3 | 13.10  | 2.23 | 476.44    | 1,577.61  |
| 39 | invasive ductal carcinoma  | G3 | 10.01  | 1.29 | 1,022.30  | 3,553.12  |
| 40 | invasive lobular carcinoma | G3 | 4.90   | 1.65 | 741.76    | 1,335.16  |
| 41 | invasive ductal carcinoma  | G3 | 19.97  | 3.59 | 3,779.61  | 7,447.35  |
| 42 | invasive lobular carcinoma | G3 | 41.61  | 6.68 | 30,610.96 | 93,101.13 |
| 43 | invasive ductal carcinoma  | G3 | 194.82 | 9.35 | 5,311.23  | 6,030.04  |
| 44 | invasive ductal carcinoma  | G3 | 10.01  | 1.29 | 570.91    | 1,534.33  |

**Appendix table S1. Characteristics of human breast cancer samples.** Histopathological characteristics including histological subtype and grade as well as uPA/PAI-1 protein content and neutrophil accumulation in the analyzed breast cancer samples are shown.

| antibody                   | systemic neutrophil count [ $\times 10^3 \mu\text{l}^{-1}$ ] |
|----------------------------|--------------------------------------------------------------|
| isotype control            | 4.09 $\pm$ 0.2                                               |
| anti-Ly-6G mAb (clone 1A8) | 0.04 $\pm$ 0.1 <sup>#</sup>                                  |

| antibody              | systemic cMO count [ $\times 10^3 \mu\text{l}^{-1}$ ] |
|-----------------------|-------------------------------------------------------|
| isotype control       | 0.41 $\pm$ 0.04                                       |
| anti-CCR2 mAb (MC-21) | 0.03 $\pm$ 0.01 <sup>#</sup>                          |

**Appendix table S2. Depletion of neutrophils and cMOs.** Systemic counts of neutrophils and cMOs in the peripheral blood of 4T1 tumor-bearing WT mice receiving neutrophil-depleting (anti-Ly-6G), cMO-depleting (anti-CCR2), or isotype control antibodies. Quantitative data are shown (mean $\pm$ SEM for n=7; #p<0.05 vs. isotype control).

| figure                         | n   | p value  | statistical test |
|--------------------------------|-----|----------|------------------|
| 1a (left, neutrophils)         | 5   | < 0.0001 | One-way ANOVA    |
| 1a (left, cMOs)                | 5   | < 0.0001 | One-way ANOVA    |
| 1a (left, ncMOs)               | 5   | 0.0217   | One-way ANOVA    |
| 1a (right, B cells)            | 5   | 0.7697   | t test           |
| 1a (right, CD4+ cells)         | 5   | 0.6088   | t test           |
| 1a (right, CD8+ cells)         | 5   | 0.7311   | t test           |
| 1b (neutrophils)               | 4   | 0.002    | One-way ANOVA    |
| 1b (cMOs)                      | 4   | 0.0012   | One-way ANOVA    |
| 1c (neutrophil rolling)        | 4   | 0.9983   | One-way ANOVA    |
| 1c (neutrophil adherence)      | 4   | < 0.0001 | One-way ANOVA    |
| 1c (neutrophil transmigration) | 4   | < 0.0001 | One-way ANOVA    |
| 1c (cMO rolling)               | 4   | 0.1212   | One-way ANOVA    |
| 1c (cMO adherence)             | 4   | < 0.0001 | One-way ANOVA    |
| 1c (cMO transmigration)        | 4   | < 0.0001 | One-way ANOVA    |
| 2b (ICAM-1)                    | 4   | 0.0436   | t test           |
| 2b (VCAM-1)                    | 4   | 0.0428   | t test           |
| 2c                             | 4   | < 0.0001 | One-way ANOVA    |
| 2d (ICAM-1)                    | 4   | < 0.0001 | One-way ANOVA    |
| 2d (VCAM-1)                    | 4   | < 0.0001 | One-way ANOVA    |
| 2d (uPA)                       | 4   | 0.6479   | t test           |
| 2d (PAI-1)                     | 4   | 0.0108   | t test           |
| 2e (ICAM-1)                    | 4   | 0.0219   | One-way ANOVA    |
| 2e (VCAM-1)                    | 4   | 0.9798   | One-way ANOVA    |
| 2f (kim127)                    | 6   | 0.0499   | One-way ANOVA    |
| 2f (mAB24)                     | 6   | 0.0096   | One-way ANOVA    |
| 2g                             | 30  | < 0.0001 | One-way ANOVA    |
| 3c (MMP-9)                     | 4-6 | 0.8857   | t test           |
| 3c (VEGF)                      | 4-6 | 0.4688   | t test           |
| 3c (NE)                        | 6   | 0.0174   | t test           |
| 3d (left)                      | 6   | 0.6109   | One-way ANOVA    |
| 3d (mid)                       | 3   | 0.0125   | t test           |
| 3d (right)                     | 3   | 0.0088   | t test           |
| 4a (0)                         | 3   | < 0.0001 | One-way ANOVA    |
| 4a (0.1)                       | 3   | 0.0005   | One-way ANOVA    |
| 4a (1)                         | 3   | < 0.0001 | One-way ANOVA    |
| 4a (10)                        | 3   | < 0.0001 | One-way ANOVA    |
| 4b (neutrophil rolling)        | 6   | 0.9345   | One-way ANOVA    |
| 4b (neutrophil adherence)      | 6   | < 0.0001 | One-way ANOVA    |
| 4b (neutrophil transmigration) | 6   | < 0.0001 | One-way ANOVA    |
| 4b (cMO rolling)               | 6   | 0.213    | One-way ANOVA    |
| 4b (cMO adherence)             | 6   | < 0.0001 | One-way ANOVA    |
| 4b (cMO transmigration)        | 6   | < 0.0001 | One-way ANOVA    |
| 4d                             | 6   | 0.0091   | One-way ANOVA    |
| 4e (rolling)                   | 4-6 | 0.1948   | t test           |
| 4e (adherence)                 | 4-6 | 0.0105   | t test           |
| 4f (lung neutrophils)          | 4   | 0.0413   | t test           |
| 4f (lung tumor cells)          | 4   | 0.0489   | t test           |
| 4f (brain neutrophils)         | 4   | 0.0012   | t test           |
| 4f (brain tumor cells)         | 4   | 0.0456   | t test           |
| EV 1b (IL-6)                   | 5   | 0.0029   | t test           |
| EV 1b (TNF)                    | 5   | < 0.0001 | t test           |
| EV 1b (CXCL2)                  | 5   | 0.0059   | t test           |
| EV1b (CCL4)                    | 5   | < 0.0001 | t test           |

|                                              |     |                 |               |
|----------------------------------------------|-----|-----------------|---------------|
| EV2a (left, neutrophils)                     | 4   | 0.0274          | One-way ANOVA |
| EV2a (left, cMOs)                            | 4   | 0.0015          | One-way ANOVA |
| EV2a (right, neutrophils)                    | 4   | 0.0002          | One-way ANOVA |
| EV2a (right, cMOs)                           | 4   | < 0.0001        | One-way ANOVA |
| EV2b (left, neutrophils)                     | 4   | 0.0256          | One-way ANOVA |
| EV2b (left, cMOs)                            | 4   | 0.0006          | One-way ANOVA |
| EV2b (right, neutrophils)                    | 4   | 0.066           | One-way ANOVA |
| EV2b (right, cMOs)                           | 4   | 0.0003          | One-way ANOVA |
| EV2c (neutrophils)                           | 4   | 0.012           | One-way ANOVA |
| EV2c (cMOs)                                  | 4   | 0.0081          | One-way ANOVA |
| EV3a (macrophages)                           | 4   | 0.0215          | t test        |
| EV3a (neutrophils)                           | 4   | 0.0011          | t test        |
| EV3b                                         | 4   | 0.0440          | One-way ANOVA |
| EV3c (left)                                  | 4   | < 0.0001        | One-way ANOVA |
| EV3c (right)                                 | 4   | 0.002           | One-way ANOVA |
| Appendix Tab 2 (Ly-6G)                       | 7   | < 0.0001        | t test        |
| Appendix Tab 2 (CCR2)                        | 7   | < 0.0001        | t test        |
| Appendix Fig S1a (neutrophil rolling)        | 4   | 0.6966          | t test        |
| Appendix Fig S1a (neutrophil adherence)      | 4   | 0.6536          | t test        |
| Appendix Fig S1a (neutrophil transmigration) | 4   | 0.7970          | t test        |
| Appendix Fig S1a (cMO rolling)               | 4   | 0.4831          | t test        |
| Appendix Fig S1a (cMO adherence)             | 4   | 0.5546          | t test        |
| Appendix Fig S1a (cMO transmigration)        | 4   | 0.7420          | t test        |
| Appendix Fig S1b (ICAM-1)                    | 6   | 0.0014          | One-way ANOVA |
| Appendix Fig S1b (VCAM-1)                    | 6   | 0.0002          | One-way ANOVA |
| Appendix Fig S2a                             | 4   | 0.0002          | t test        |
| Appendix Fig S2b (left, ICAM-1)              | 6   | 0.0002          | t test        |
| Appendix Fig S2b (left, VCAM-1)              | 6   | < 0.0001        | t test        |
| Appendix Fig S2b (right, ICAM-1)             | 6   | < 0.0001        | t test        |
| Appendix Fig S2b (right, VCAM-1)             | 6   | < 0.0001        | t test        |
| Appendix Fig S2d (left)                      | 4   | 0.8803          | t test        |
| Appendix Fig S2d (right)                     | 4   | 0.7205          | t test        |
| Appendix Fig S3b                             | 6   | 0.3419 - 0.0062 | One-way ANOVA |
| Appendix Fig S3c                             | 7   | 0.0004          | One-way ANOVA |
| Appendix Fig S4c (brain, neutrophils)        | 4-6 | 0.0035          | One-way ANOVA |
| Appendix Fig S4c (brain, tumor cells)        | 4-6 | 0.0004          | One-way ANOVA |
| Appendix Fig S4c (lungs, neutrophils)        | 4-6 | < 0.0001        | One-way ANOVA |
| Appendix Fig S4c (lungs, tumor cells)        | 4-6 | < 0.0001        | One-way ANOVA |

**Appendix table S3. Statistical data.** For each dataset presented in the figures, exact n and p values as well as statistical tests employed are shown.

## Appendix figures

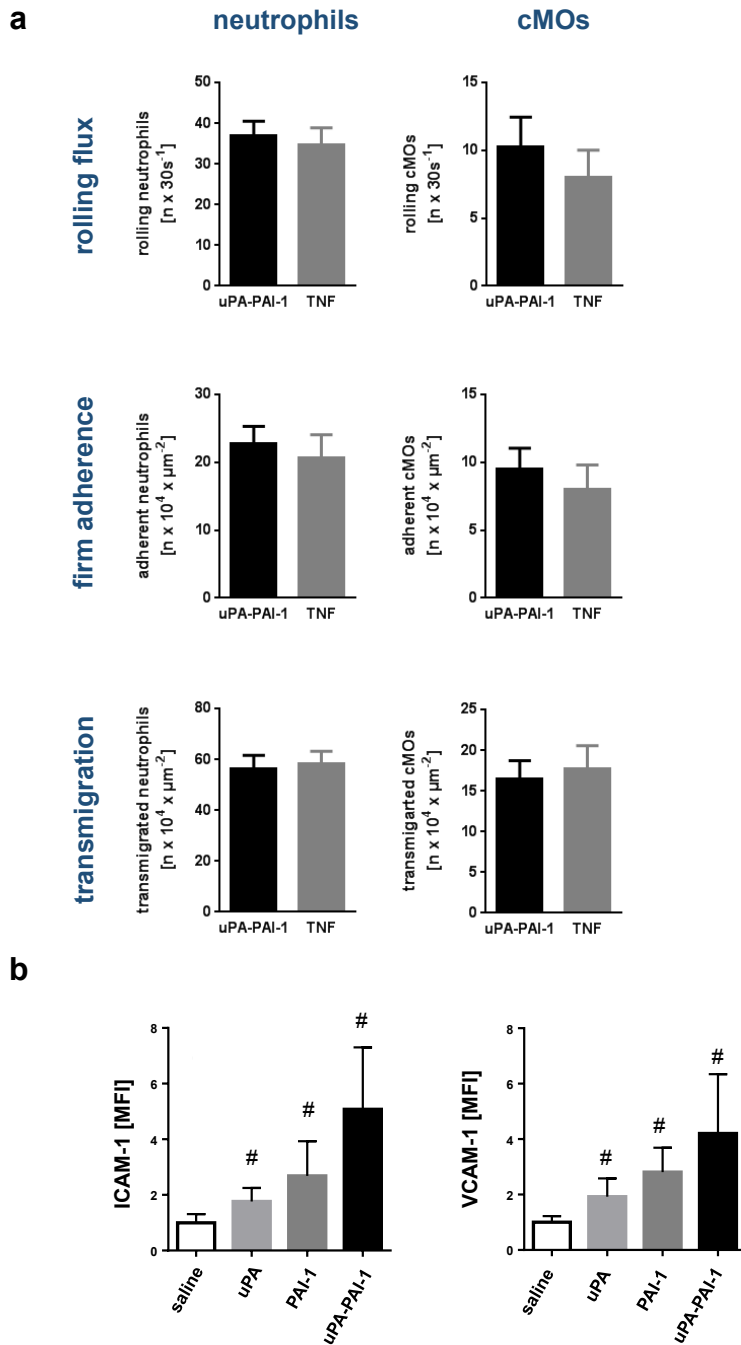

**Appendix figure S1. Relative effect of uPA-PAI-1 on the trafficking of neutrophils and cMOs and on endothelial cell activation.** (a) Intravascular endothelial cell interactions and transmigration of neutrophils (Ly-6G<sup>+</sup> CX<sub>3</sub>CR-1<sup>-</sup>) and cMOs (Ly-6G<sup>-</sup> CX<sub>3</sub>CR-1<sup>low</sup>) to the perivascular tissue as assessed 6 h after intrascrotal stimulation with recombinant murine uPA-PAI-1 or TNF in postcapillary venules of the cremaster of CX<sub>3</sub>CR-1<sup>GFP/+</sup> mice by multi-channel *in vivo* microscopy. Quantitative data are shown (mean±SEM for n=4 mice/experiments per group). (b) Expression of ICAM-1/CD54 or VCAM-1/CD106 in the cremaster muscle of WT mice as assessed *ex vivo* by confocal laser scanning microscopy 6 h after intrascrotal injection of recombinant murine uPA, PAI-1, uPA-PAI-1, or saline. Quantitative data are shown (mean±SEM for n=4 mice per group; #p<0.05 vs. saline).

**a**

primary macrophages

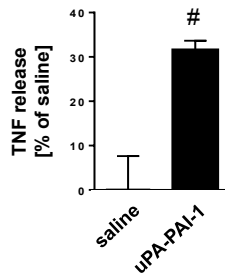**b**

endothelial cells co-cultured with macrophages exposed to saline, TNF or, uPA-PAI-1

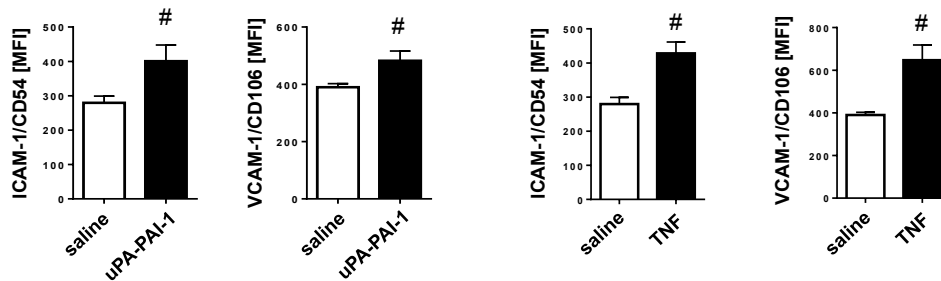**c**

primary neutrophils

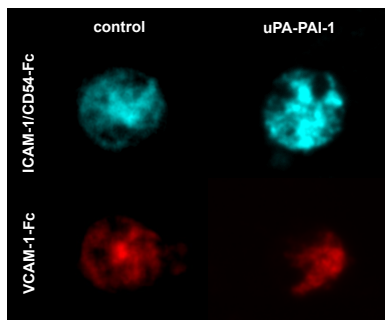**d**

tumor cells

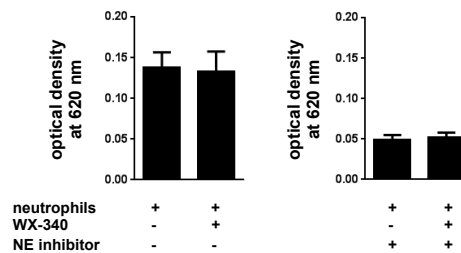

**Appendix figure S2. Mechanisms underlying uPA-PAI-1-dependent cell activation.** (a) Production of TNF was analyzed in peritoneal macrophages harvested from WT mice. (b) Surface expression of ICAM-1/CD54 or VCAM-1/CD106 on mouse bEnd.3 microvascular endothelial cells co-cultured with mouse RAW 264.7 macrophages prior to this exposed to saline, recombinant murine uPA-PAI-1, or TNF as assessed *in vitro* by multi-channel flow cytometry. Quantitative data are shown (mean±SEM for n=4-6 experiments per group; #p<0.05 vs. saline). (c) Binding of ICAM-1/CD54-Fc or VCAM-1/CD106-Fc to primary mouse neutrophils upon exposure to saline or recombinant murine uPA-PAI-1 as assessed by confocal microscopy, representative images are shown. (d) Proliferation of 4T1 breast cancer cells upon exposure to primary neutrophils isolated from the peritoneal cavity of WT mice undergoing 6 h of intra-peritoneal stimulation with uPA-PAI-1 with or without addition of compound WX-340 and a NE inhibitor as assessed by a MTT assay, quantitative data are shown (mean±SEM for n=4 experiments per group).



a

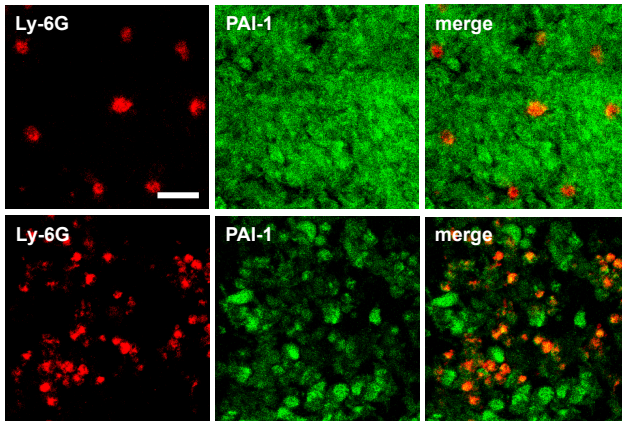

b

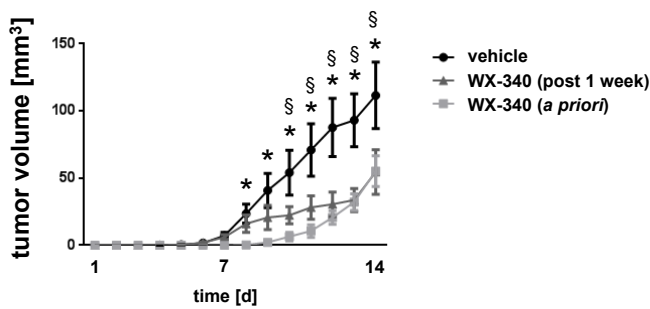

c

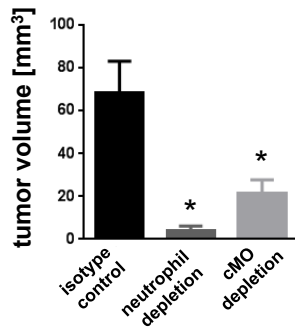

**Appendix figure S3. Effect of WX-340 as well as of depletion of neutrophils and cMOs for local tumor growth.** (a) Representative confocal microscopy images of uPA or PAI-1 expression (green) in mouse 4T1 tumors infiltrated by Ly-6G<sup>+</sup> neutrophils (red; scale bar: 25  $\mu$ m). (b) Tumor volume in animals treated with WX-340 *a priori* or therapeutically after 1 week after tumor cell injection on a daily basis as assessed in an orthotopic model of 4T1 breast cancer in WT mice (mean $\pm$ SEM for n=6 mice per group; \*p<0.05 vs. drug vehicle). (c) Tumor volume in animals treated with neutrophil- or cMO-depleting monoclonal antibodies as assessed on day 14 after tumor-cell injection in an orthotopic model of 4T1 breast cancer in WT mice (mean $\pm$ SEM for n=7 mice per group; \*p<0.05 vs. isotype control).

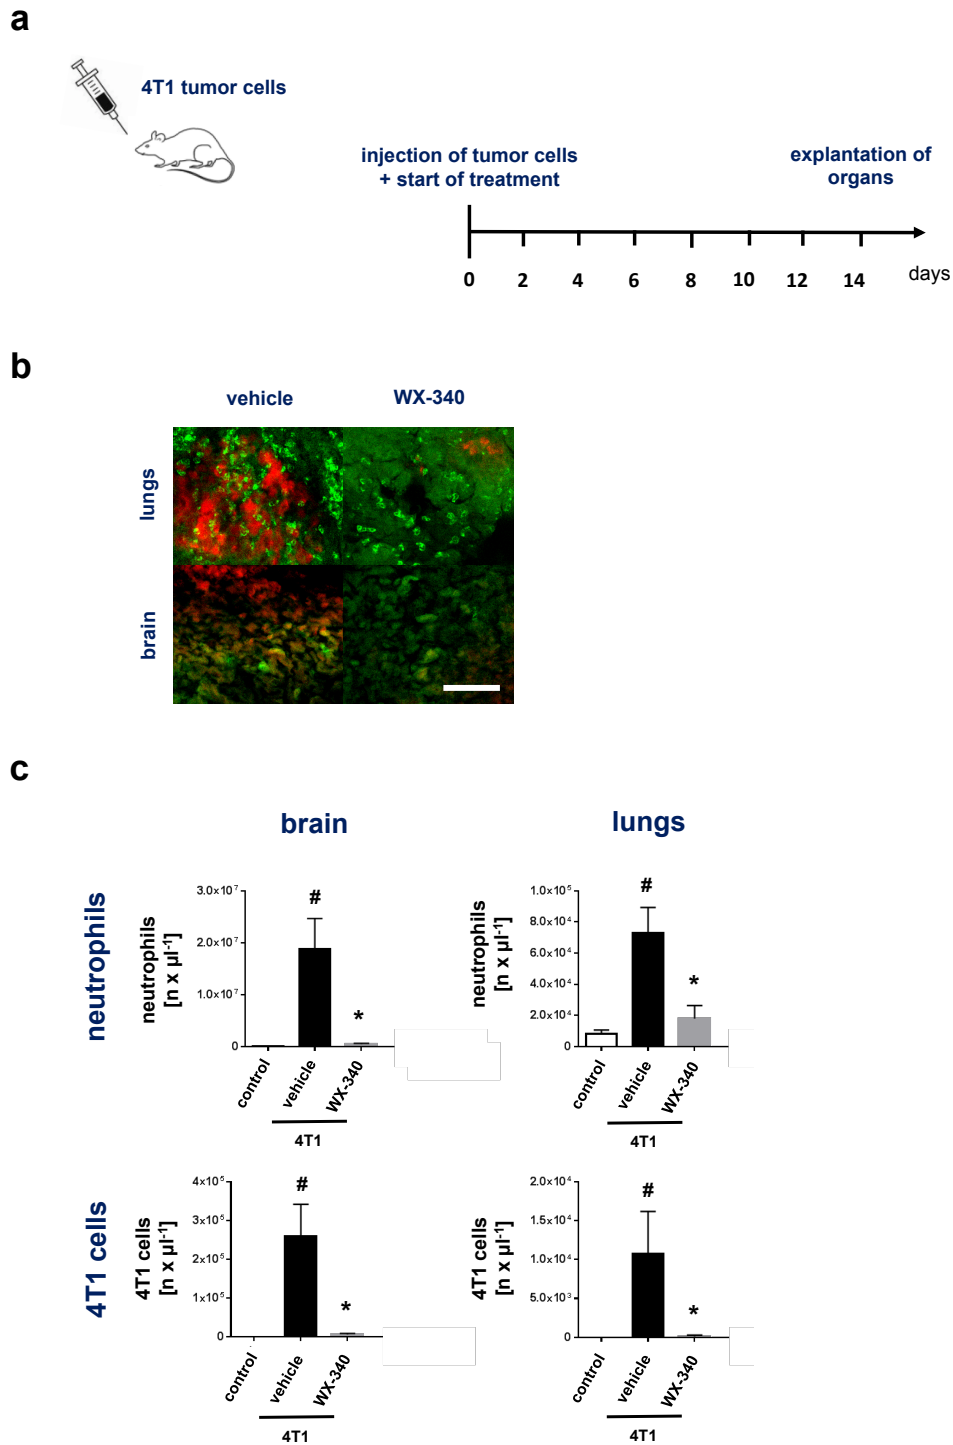

**Appendix figure S4. Effect of WX-340 on neutrophil infiltration and metastatic seeding in 4T1 breast cancer metastasis.** Accumulation of neutrophils and 4T1 breast cancer cells in lungs and brains of WT mice treated *a priori* intra-peritoneally with WX-340 or drug vehicle (daily) as assessed 14 days after intravenous injection of 4T1 breast cancer cells by multi-channel flow cytometry in the tissue homogenates. **(a)** The experimental protocol, **(b)** representative confocal microscopy images of tumor metastases (red) and neutrophils (green; scale bar: 100  $\mu\text{m}$ ) in lungs and brain, and **(c)** quantitative data (mean $\pm$ SEM for n=4-6 mice per group; #p<0.05 vs. control; \*p<0.05 vs. vehicle) are shown.
